# Supplementary material for: A Randomized, Controlled Trial of Early versus Late Initiation of Dialysis
Source: Atypon-hosted journal article supplement (doi:10.1056/nejmoa1000552), 2010-06-27
Supplement: nejmoa1000552_appendix.pdf [file nejmoa1000552_appendix.pdf]

## Supplementary Appendix

This appendix has been provided by the authors to give readers additional information about their work.

Supplement to: Cooper BA, Branley P, Bulfone L, et al. A randomized, controlled trial of early versus late initiation of dialysis. *N Engl J Med* 2010;363:609-19. DOI: [10.1056/NEJMoa1000552](https://doi.org/10.1056/NEJMoa1000552).

**Supplementary Appendix:**

**Kt/V: is a number used to quantify dialysis adequacy (small molecule clearance) where:**

**K = dialyzer clearance of urea**

**t = dialysis time**

**V = patient's total body water (= urea distribution)**

**GFR calculated using Cockcroft and Gault Equation with BSA Correction**

**(ml/min/1.73m<sup>2</sup>):**

$$\text{C+G GFR} = \frac{(140-\text{age}) \times \text{weight (kg)}}{\text{serum creatinine (mmol/L)} \times 814} \times \frac{1.73}{\text{BSA}} \times (0.85 \text{ if female})$$

**Body Surface Area (BSA) Equation (m<sup>2</sup>):**

$$\text{BSA} = 0.007184 \times \text{height(cm)}^{0.725} \times \text{weight(kg)}^{0.425}$$

**GFR calculated using Modification of Diet in Renal Disease (MDRD) Equation**

**(ml/min/1.73m<sup>2</sup>):**

$$\text{MDRD GFR} = 186 \times (\text{serum creatinine (umol/L)} / 88.4)^{-1.154} \times (\text{age})^{-0.203} \\ \times (0.742 \text{ if female}) \times (1.210 \text{ if of African descent})$$

**Table 1.** Reasons 159 Registered Patients Were Not Randomized

| <b>Reason</b>                                                                        | <b>Number</b> |
|--------------------------------------------------------------------------------------|---------------|
| Patient did not reach GRF 15mls/min/1.73m <sup>2</sup> by the close of randomization | 35            |
| Died                                                                                 | 20            |
| Started dialysis before randomization - no reason given                              | 39            |
| Started dialysis before randomization because of uremia                              | 20            |
| Started dialysis before randomization because of uncontrolled fluid overload         | 6             |
| Started dialysis before randomization because of septicemia                          | 1             |
| Started dialysis before randomization because of cardiac co-morbidity                | 1             |
| Started dialysis before randomization because of major surgery                       | 1             |
| Patient withdrawal of consent                                                        | 9             |
| Sudden unexpected decline in GFR to <10 ml/min/1.73m <sup>2</sup>                    | 7             |
| Patient unable to be followed up because of transfer to non-participating hospital   | 5             |
| Physician discretion                                                                 | 4             |
| Transplanted or planned transplant before randomization                              | 4             |
| Cancer                                                                               | 2             |
| Reason not recorded                                                                  | 2             |
| Unable to contact patient                                                            | 2             |
| Recovered renal function                                                             | 1             |

Table 2: List of Protocol Violations.

| <b>Reason for not starting dialysis in assigned GFR range (protocol violations)</b> | <b>Randomized to early start group but started with GFR &lt; 10ml/min/1.73m<sup>2</sup> (n=75)</b> | <b>Randomized to late start group but started with GFR &gt;7ml/min/1.73m<sup>2</sup> (n=322)</b> |
|-------------------------------------------------------------------------------------|----------------------------------------------------------------------------------------------------|--------------------------------------------------------------------------------------------------|
| Uremia                                                                              | 5                                                                                                  | 234                                                                                              |
| Physician discretion                                                                | 10                                                                                                 | 25                                                                                               |
| Fluid overload                                                                      | 1                                                                                                  | 28                                                                                               |
| Delay in access creation                                                            | 21                                                                                                 | 1                                                                                                |
| Patient refusal                                                                     | 13                                                                                                 | 3                                                                                                |
| Unavailability of resources                                                         | 6                                                                                                  | 6                                                                                                |
| Delayed follow up                                                                   | 6                                                                                                  | .                                                                                                |
| Sudden unexpected decline in GFR                                                    | 6                                                                                                  | .                                                                                                |
| Malnutrition                                                                        | .                                                                                                  | 5                                                                                                |
| Hyperkalaemia                                                                       | .                                                                                                  | 4                                                                                                |
| Malaise and fatigue                                                                 | .                                                                                                  | 3                                                                                                |
| Sudden unexpected improvement in GFR                                                | .                                                                                                  | 2                                                                                                |
| Other reasons*                                                                      | 7                                                                                                  | 11                                                                                               |

\*Reasons include: change in patients social circumstances (2), failed pre-emptive transplant overseas, emigration, transferred to a non-participating hospital, accidental randomization after starting dialysis, started early prior to major surgery, patient became un-contactable, acute myocardial infarction, unstable angina, severe hypertension, severe gout, peritonitis, intestinal perforation, neuropathy (2), pruritis and septicemia.
